# Supplementary material for: The UFM1 Pathway Impacts HCMV US2-Mediated Degradation of HLA Class I
Source: MDPI journal article supplement (doi:10.3390/molecules26020287), 2021-01-08

**Figure 1: A genome-wide CRISPR/Cas9 screen identifies the UFM1 pathway to affect HCMV US2-mediated degradation of HLA class I**

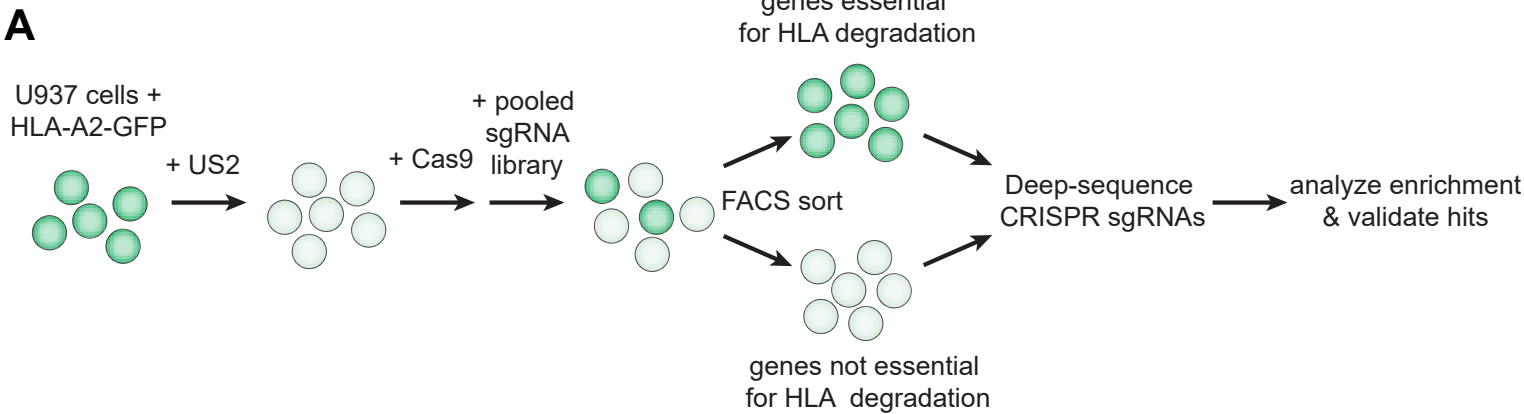

**B**

| Gene ID | Gene symbol | Full name                                      | Enriched at: |        | Included in validation studies: |
|---------|-------------|------------------------------------------------|--------------|--------|---------------------------------|
|         |             |                                                | 7 dpi        | 18 dpi |                                 |
| 550     | AUP1        | Ancient Ubiquitous Protein 1                   |              | ✓      |                                 |
| 567     | B2M         | Beta-2 Microglobulin                           | ✓            | ✓      |                                 |
| 79587   | CARS2       | CysteinyI-tRNA Synthetase 2, Mitochondrial     |              | ✓      | ✓                               |
| 27235   | COQ2        | Coenzyme Q2, Polyprenyltransferase             |              | ✓      | ✓                               |
| 23197   | FAF2        | Fas-Associated Factor Family Member 2          | ✓            | ✓      |                                 |
| 192286  | HIGD2A      | HIG1 Hypoxia Inducible Domain Family Member 2A |              | ✓      | ✓                               |
| 6782    | HSPA13      | Heat Shock Protein Family (Hsp70) Member 13    | ✓            |        | ✓                               |
| 4528    | MTIF2       | Mitochondrial Translation Initiation Factor 2  |              | ✓      | ✓                               |
| 54539   | NDUFB11     | NADH:Ubiquinone Oxidoreductase Subunit B11     |              | ✓      | ✓                               |
| 55666   | NPLOC4      | NPL4 Homolog, Ubiquitin Recognition Factor     | ✓            | ✓      |                                 |
| 5687    | PSMA6       | Proteasome Subunit Alpha 6                     | ✓            |        |                                 |
| 5695    | PSMB7       | Proteasome Subunit Beta 7                      | ✓            |        | ✓                               |
| 5702    | PSMC3       | Proteasome 26S Subunit, ATPase 3               | ✓            |        |                                 |
| 5705    | PSMC5       | Proteasome 26S Subunit, ATPase 5               | ✓            |        |                                 |
| 5718    | PSMD12      | Proteasome 26S Subunit, Non-ATPase 12          | ✓            |        |                                 |
| 5719    | PSMD13      | Proteasome 26S Subunit, Non-ATPase 13          | ✓            |        | ✓                               |
| 5709    | PSMD3       | Proteasome 26S Subunit, Non-ATPase 3           | ✓            |        |                                 |
| 254958  | REXO1L1     | RNA Exonuclease 1 Homolog Like 1, Pseudogene   | ✓            |        | ✓                               |
| 11236   | RNF139      | Ring Finger Protein 139                        | ✓            | ✓      | ✓                               |
| 29927   | SEC61A1     | SEC61 Translocon Alpha 1 Subunit               | ✓            | ✓      | ✓                               |
| 10952   | SEC61B      | SEC61 Translocon Beta Subunit                  |              | ✓      | ✓                               |
| 7095    | SEC62       | SEC62 Homolog, Preprotein Translocation Factor | ✓            | ✓      | ✓                               |
| 11231   | SEC63       | SEC63 Homolog, Protein Translocation Regulator |              | ✓      | ✓                               |
| 6727    | SRP14       | Signal Recognition Particle 14                 | ✓            |        |                                 |
| 6728    | SRP19       | Signal Recognition Particle 19                 | ✓            |        |                                 |
| 6731    | SRP72       | Signal Recognition Particle 72                 | ✓            |        | ✓                               |
| 6734    | SRPR        | SRP Receptor Alpha Subunit                     | ✓            |        | ✓                               |
| 58477   | SRPRB       | SRP Receptor Beta Subunit                      | ✓            |        | ✓                               |
| 90871   | TMEM261     | Distal Membrane Arm Assembly Complex 1         |              | ✓      | ✓                               |
| 79876   | UBA5        | Ubiquitin Like Modifier Activating Enzyme 5    |              | ✓      | ✓                               |
| 7327    | UBE2G2      | Ubiquitin Conjugating Enzyme E2 G2             | ✓            | ✓      |                                 |
| 7353    | UFD1L       | Ubiquitin Fusion Degradation 1 Like            | ✓            |        |                                 |
| 51569   | UFM1        | Ubiquitin Fold Modifier 1                      | ✓            |        | ✓                               |
| 7415    | VCP         | Valosin Containing Protein                     | ✓            |        |                                 |

Figure 1 (continued)

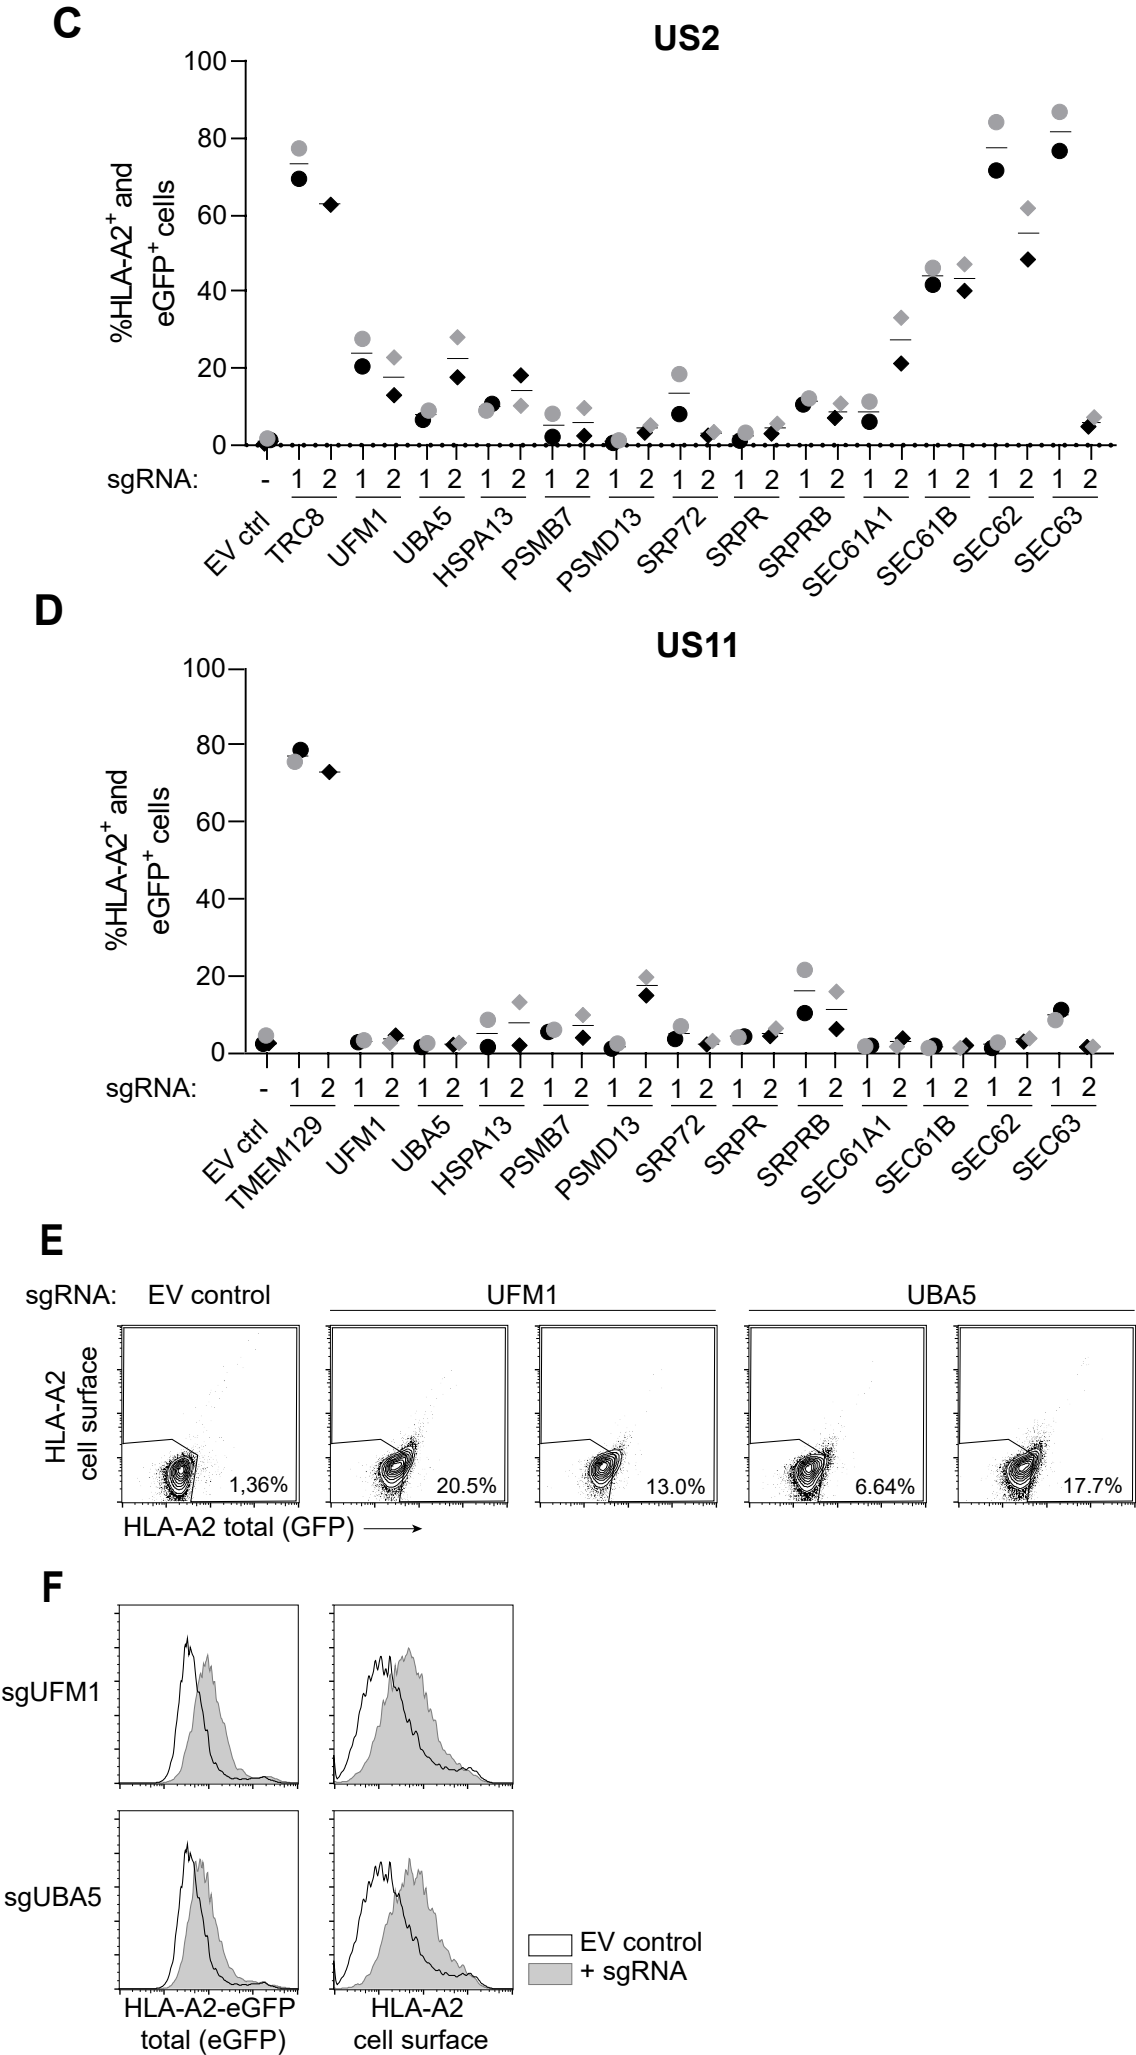



**Figure 2: US2-mediated HLA class I expression is rescued upon knockout of multiple players in the UFMylation pathway**

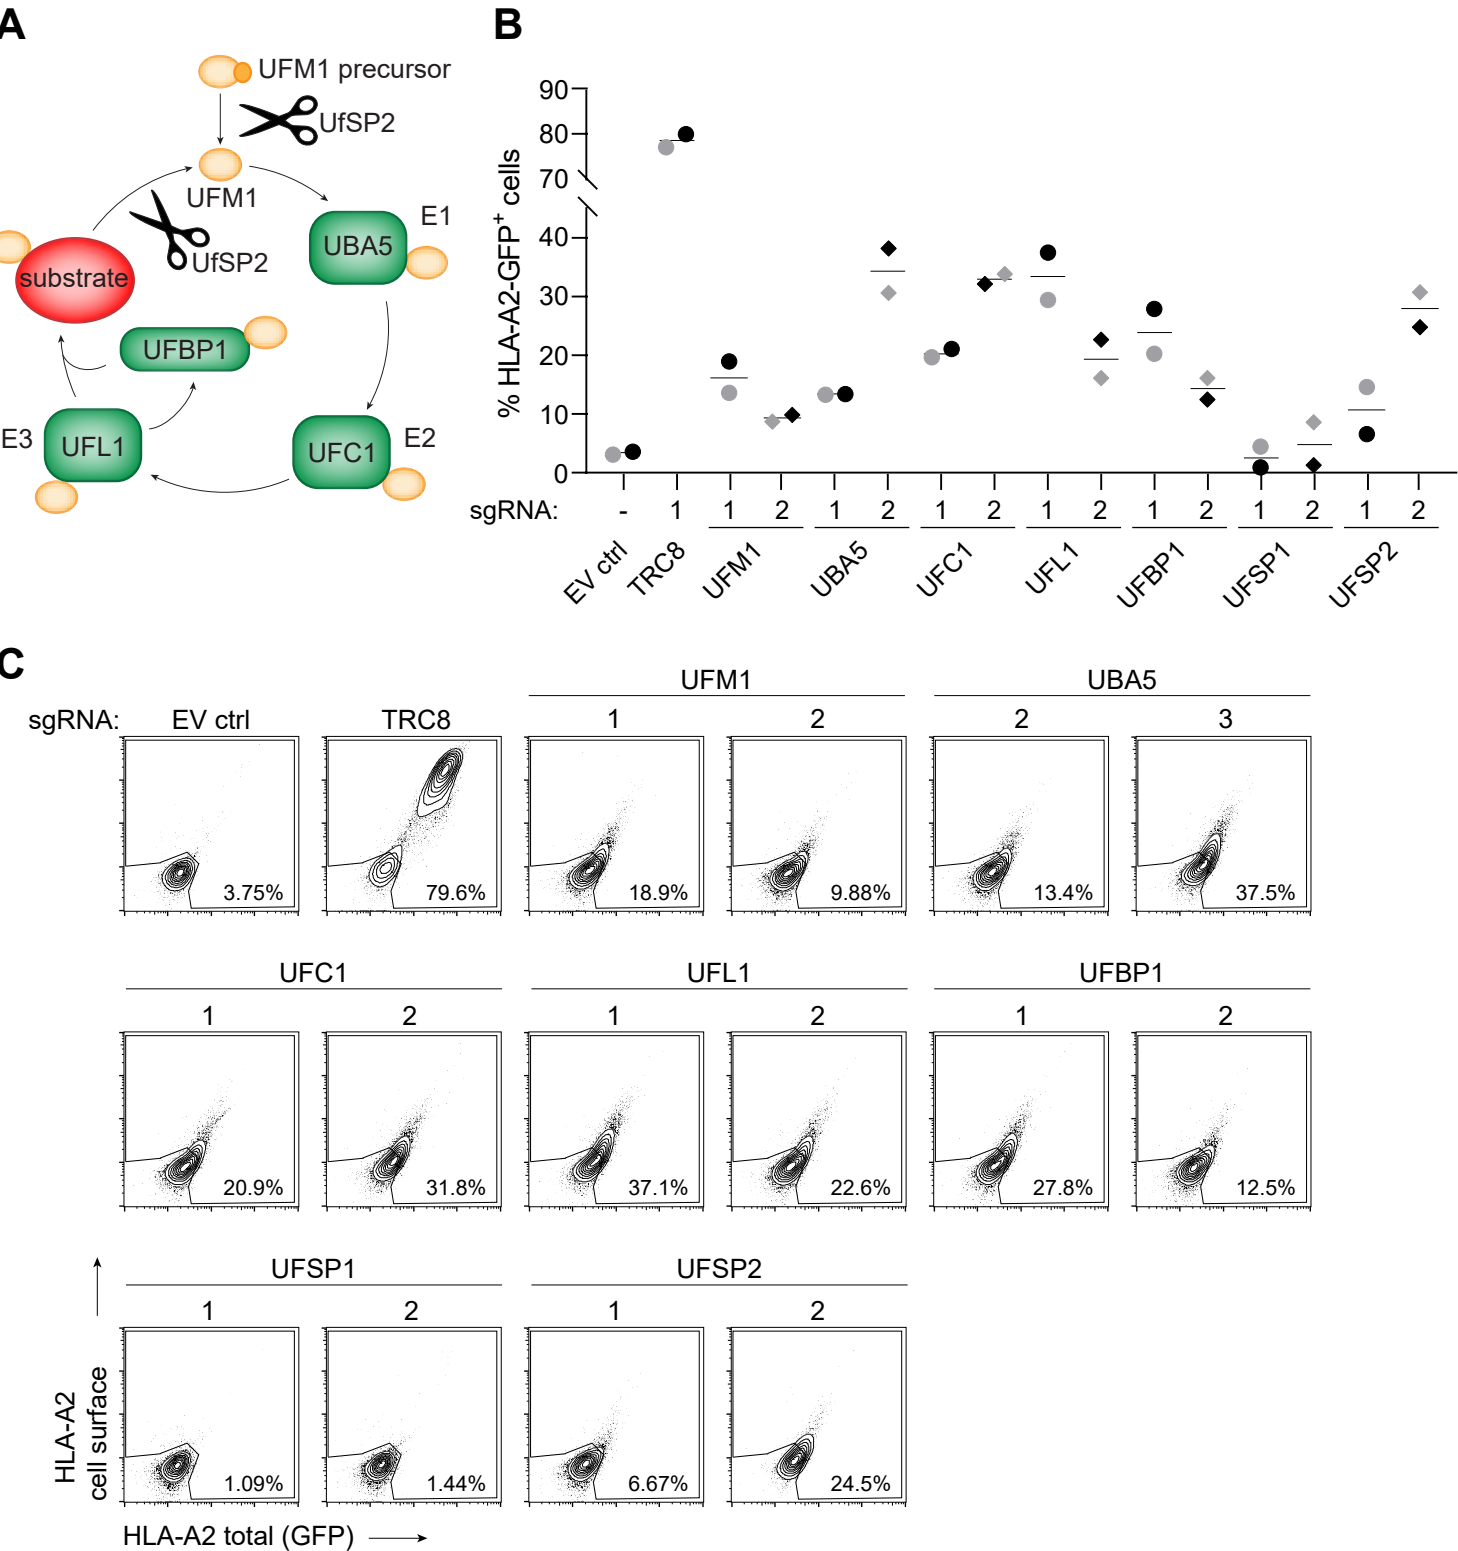

**Figure 3: Clonal knockout cell lines for UFM1 and UBA5 show stable HLA-I rescue in the presence of HCMV US2**

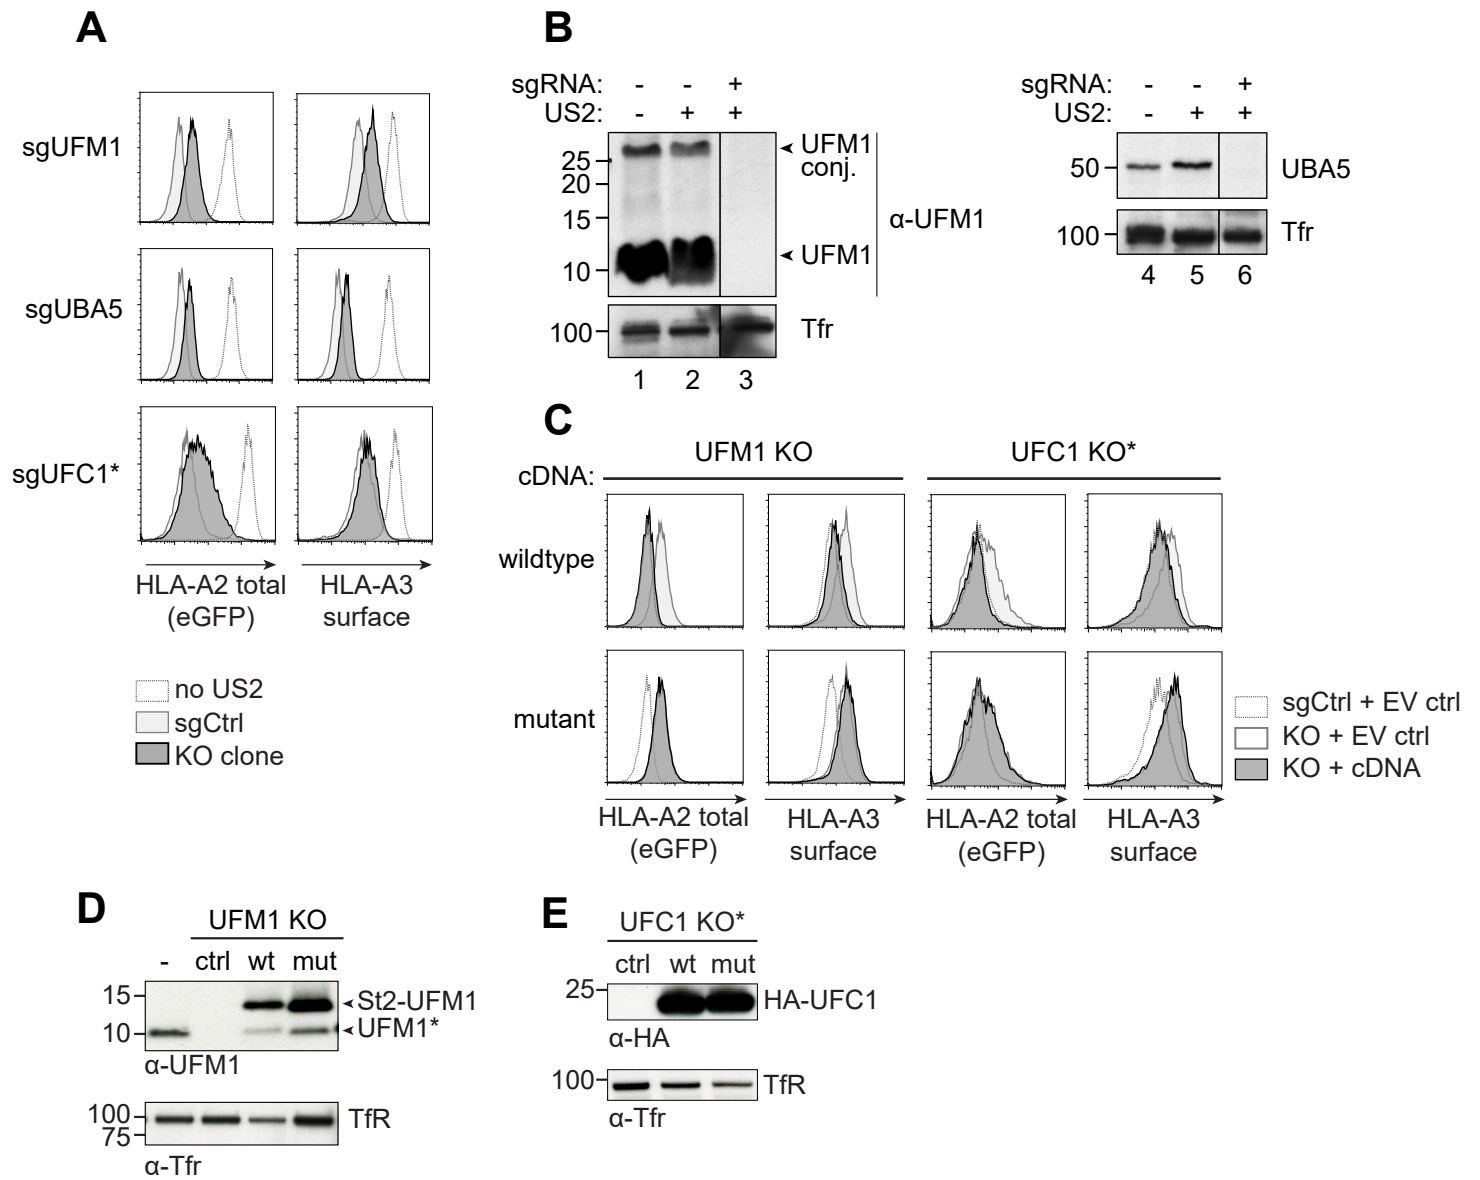

**Figure 4: HLA class I, US2, and p97 are not UFMylated in US2-expressing cells**

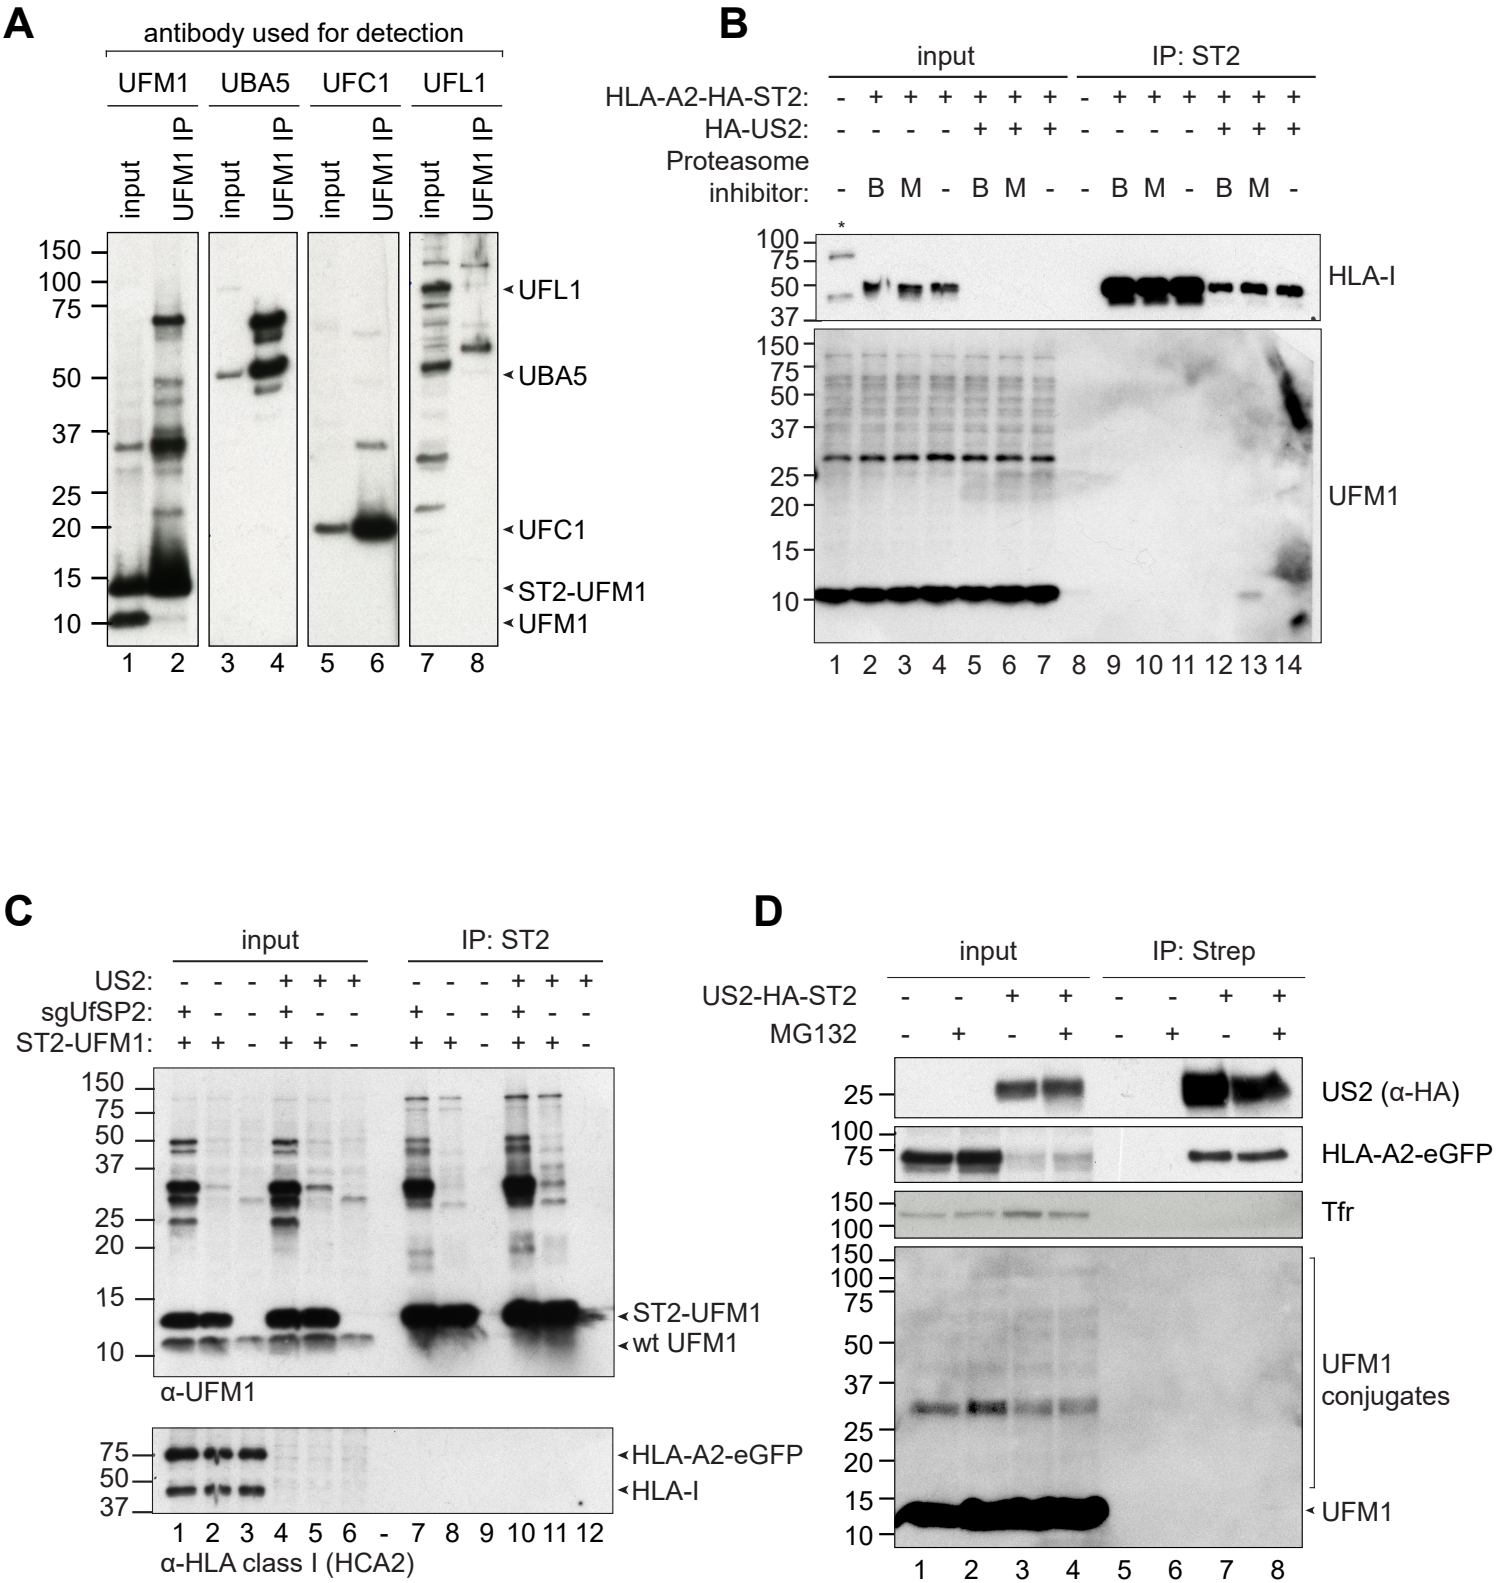

**Figure 5: Mass spectrometry identifies ribosomal UFMylation in the presence of US2**

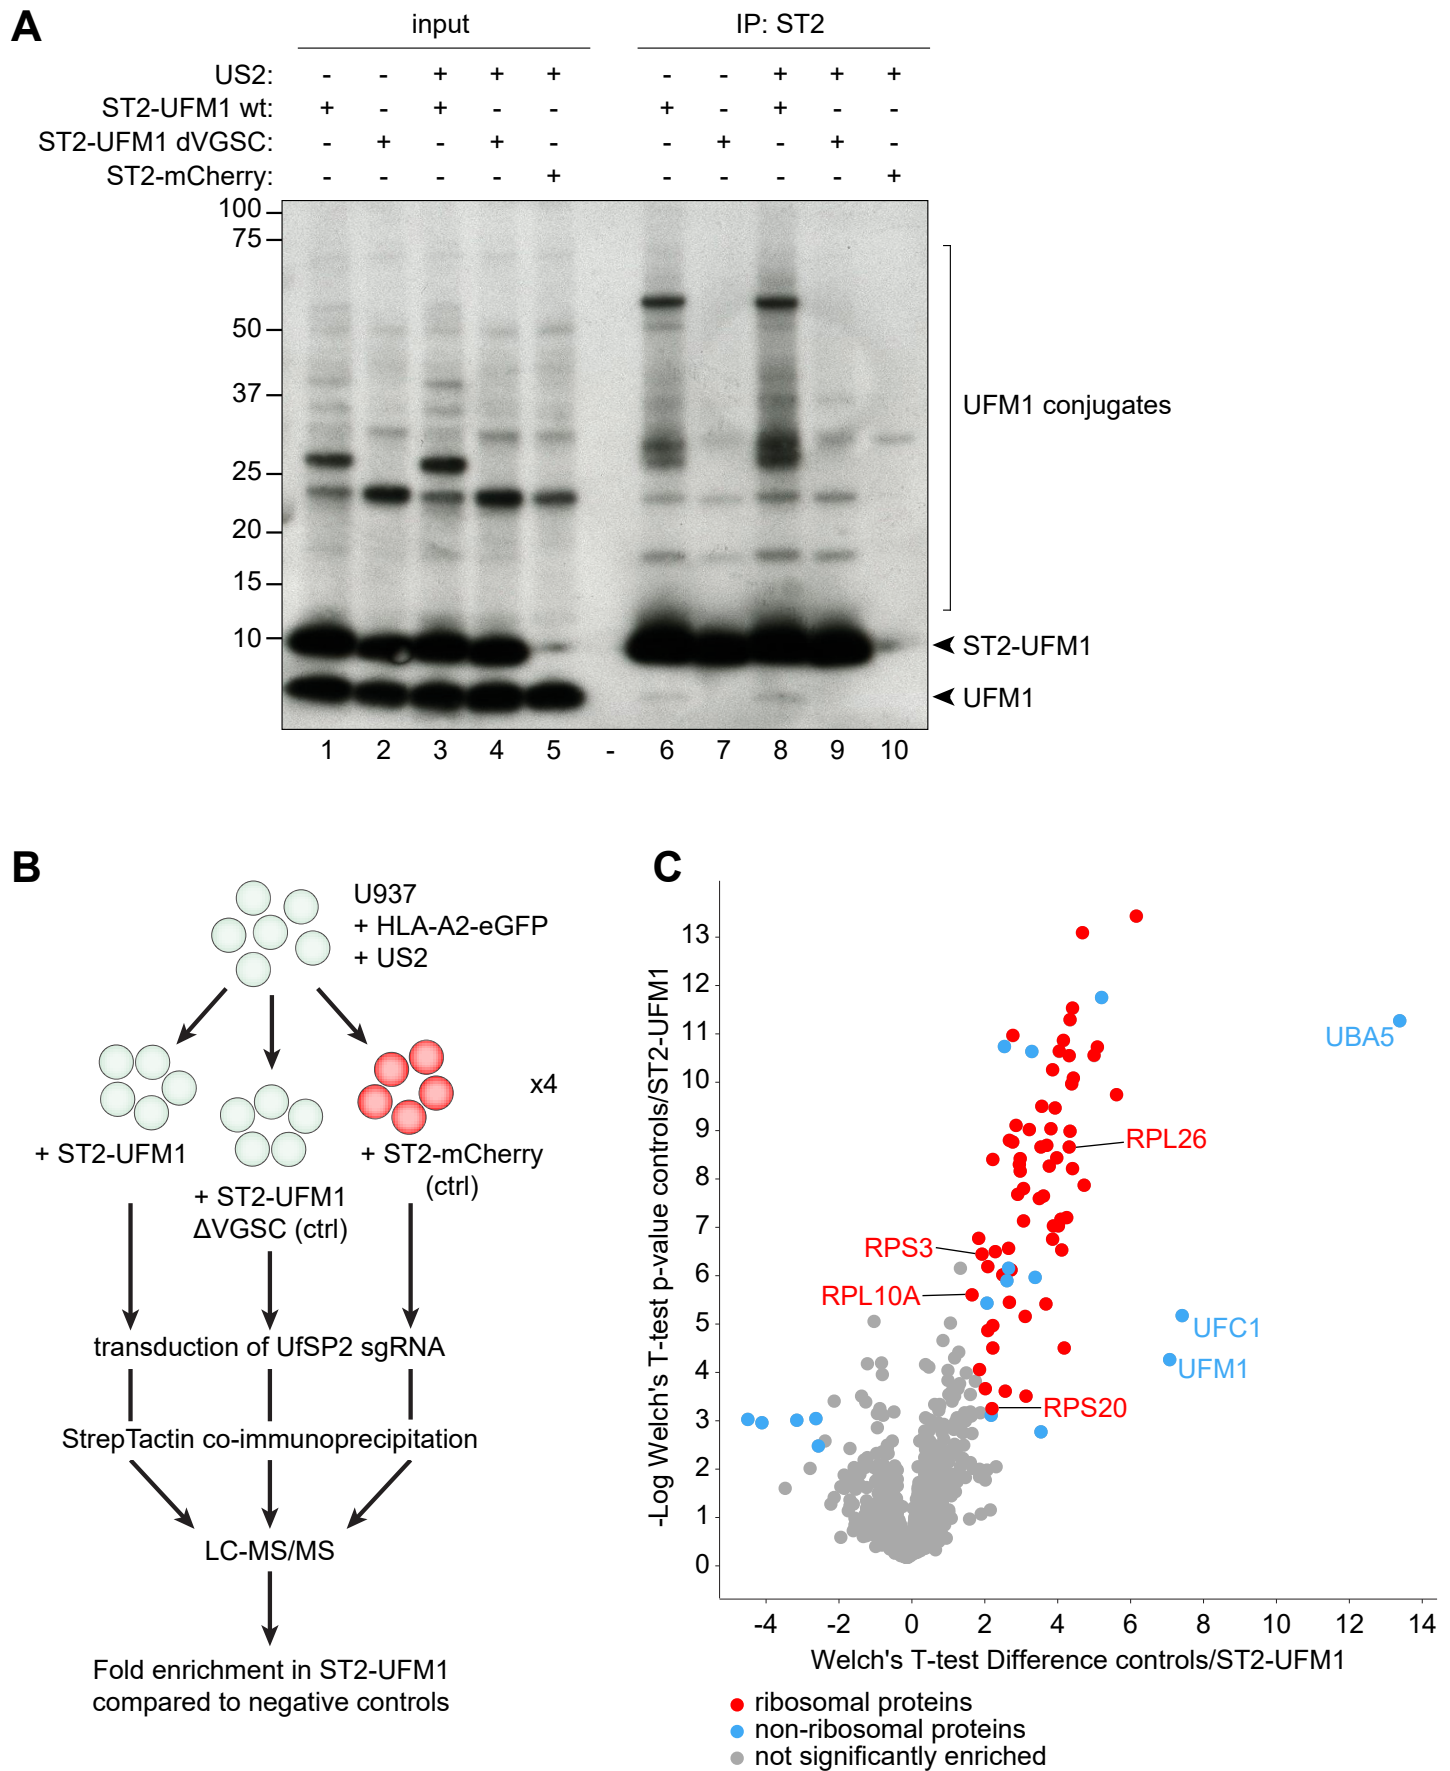

**Figure 6: Functional UFM1 is required for efficient HLA class I dislocation to the cytosol**

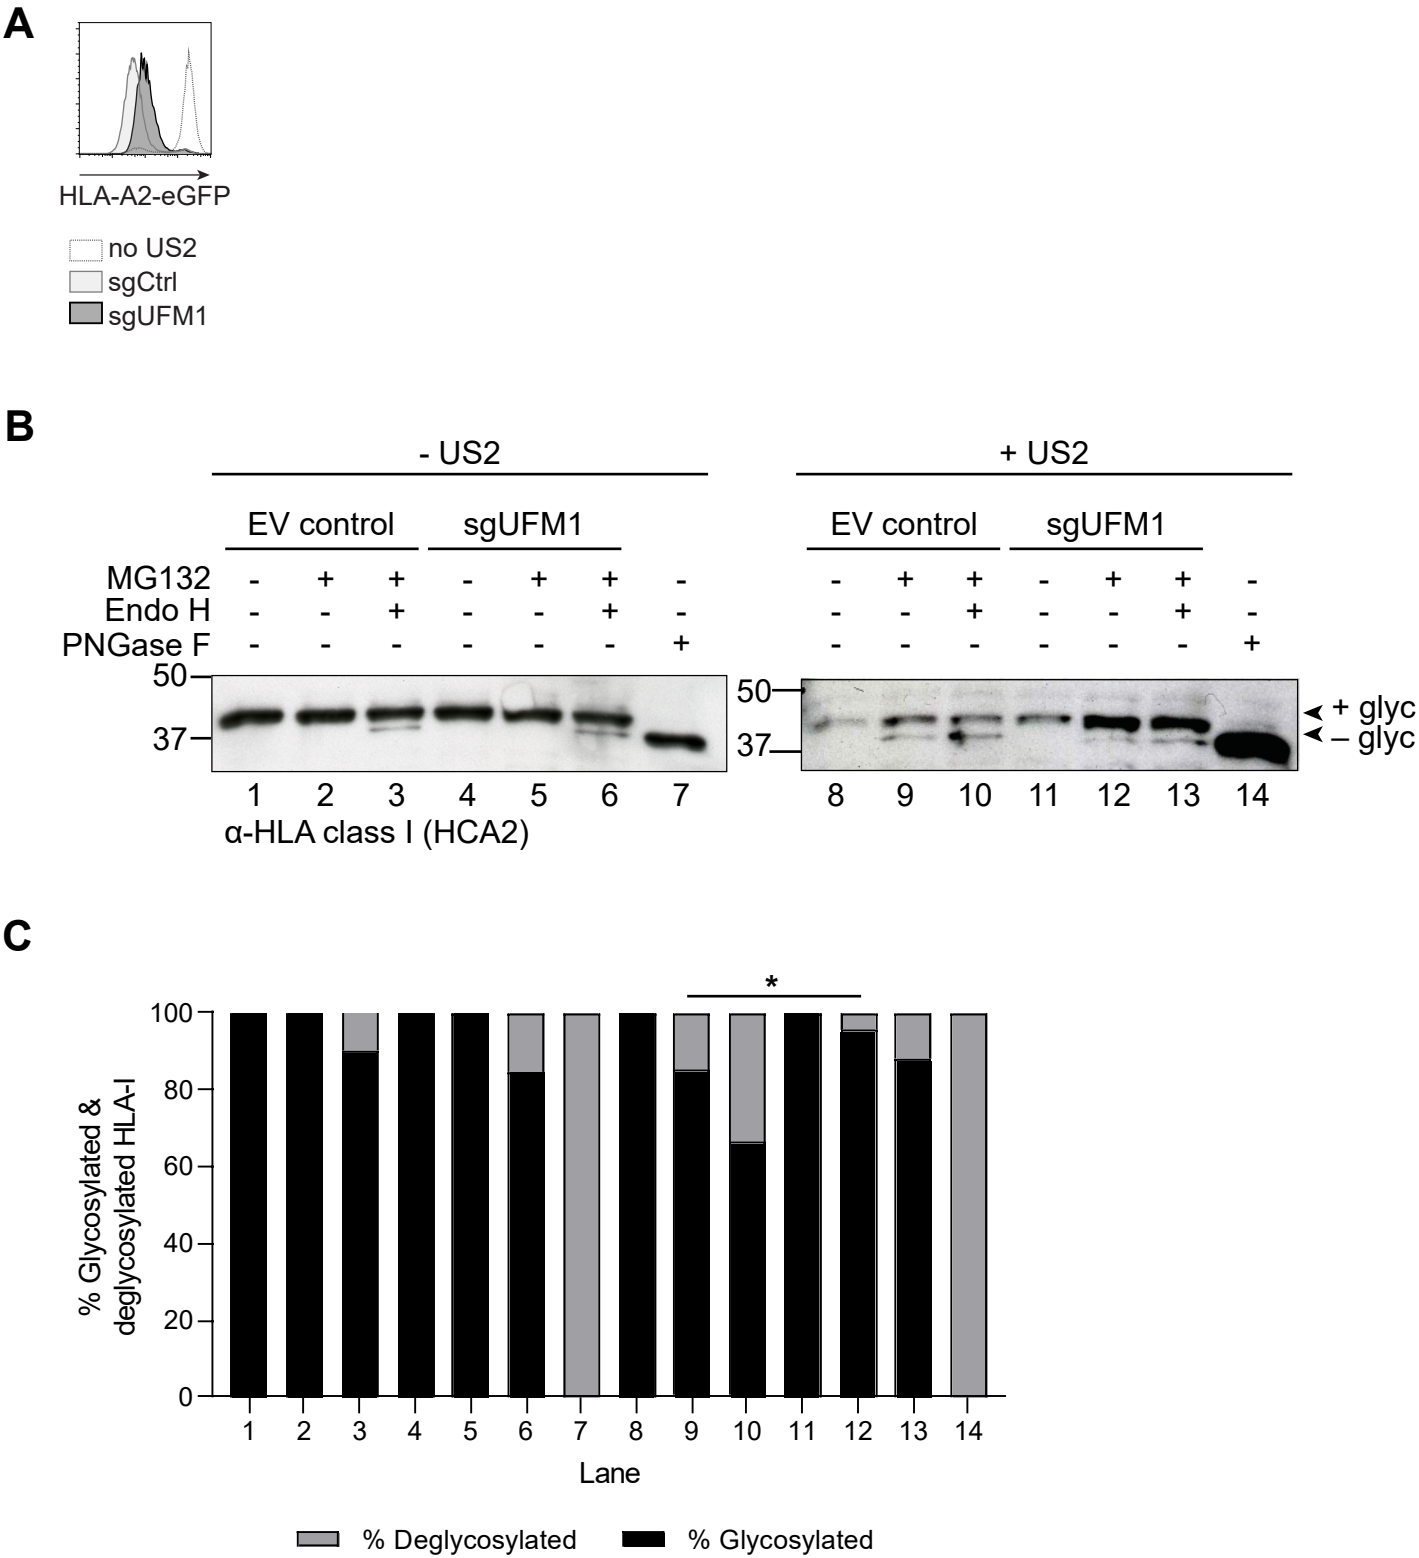

Supplement: s1 [file s1]
