# Supplementary material for: The UFM1 Pathway Impacts HCMV US2-Mediated Degradation of HLA Class I
Source: MDPI journal article supplement (doi:10.3390/molecules26020287), 2021-01-08
Supplement: s1 [file s1]

Supplementary figures

Figure S1: Validation of the genome-wide library screen at 7, 11, 18 and 28 days post-infection

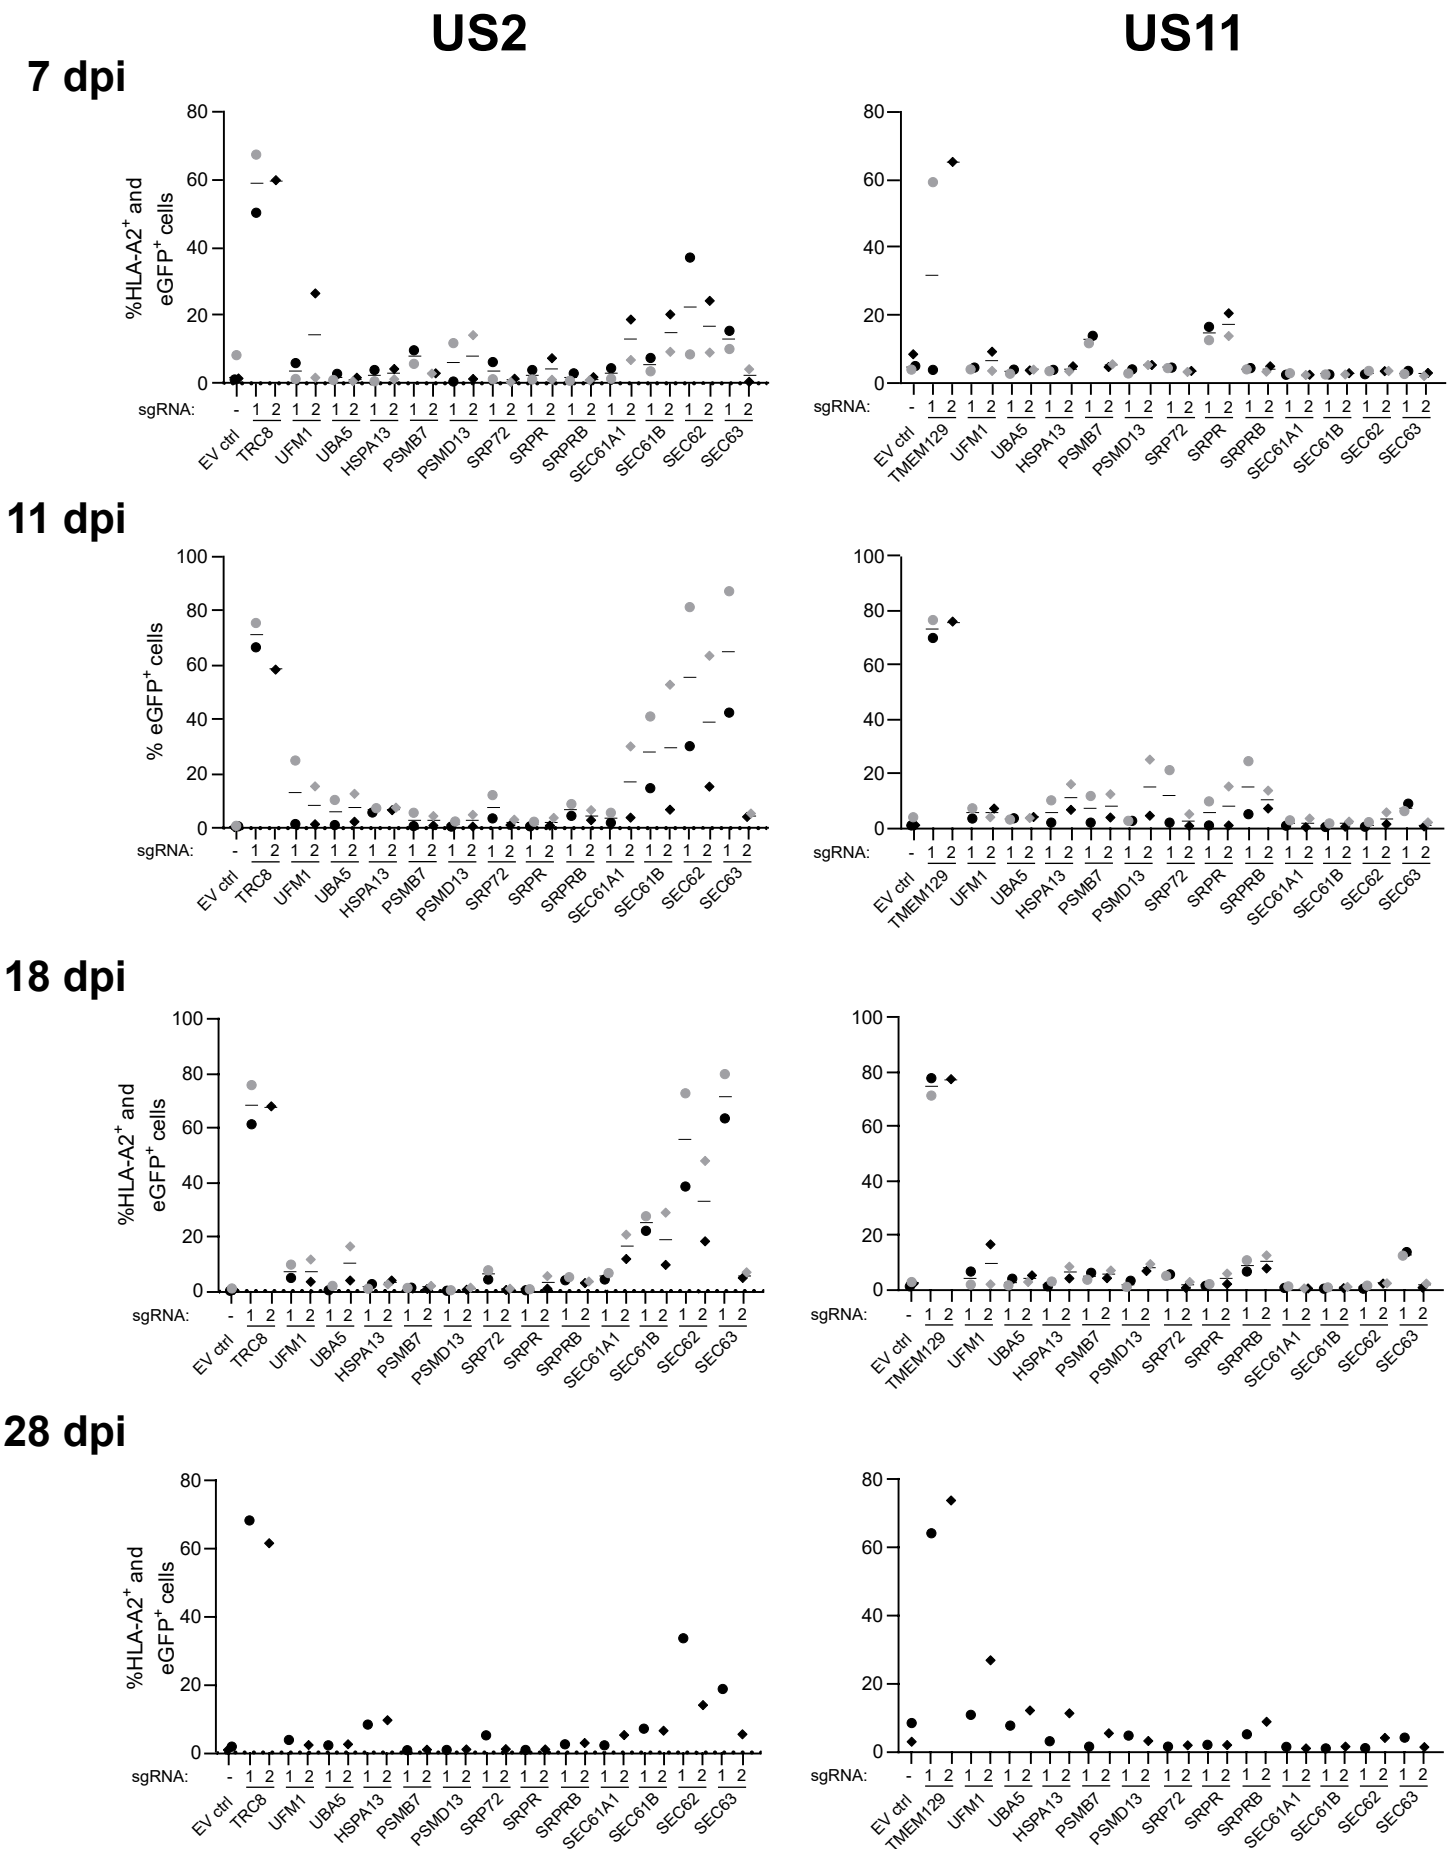

Figure S1: Validation of the genome-wide library screen at 7, 11, 18 and 28 days post-infection. Validation of the genome-wide screen was performed as described for Figure 1C.

**Figure S2: Determination of the optimal timepoint for detecting HLA-I rescue**

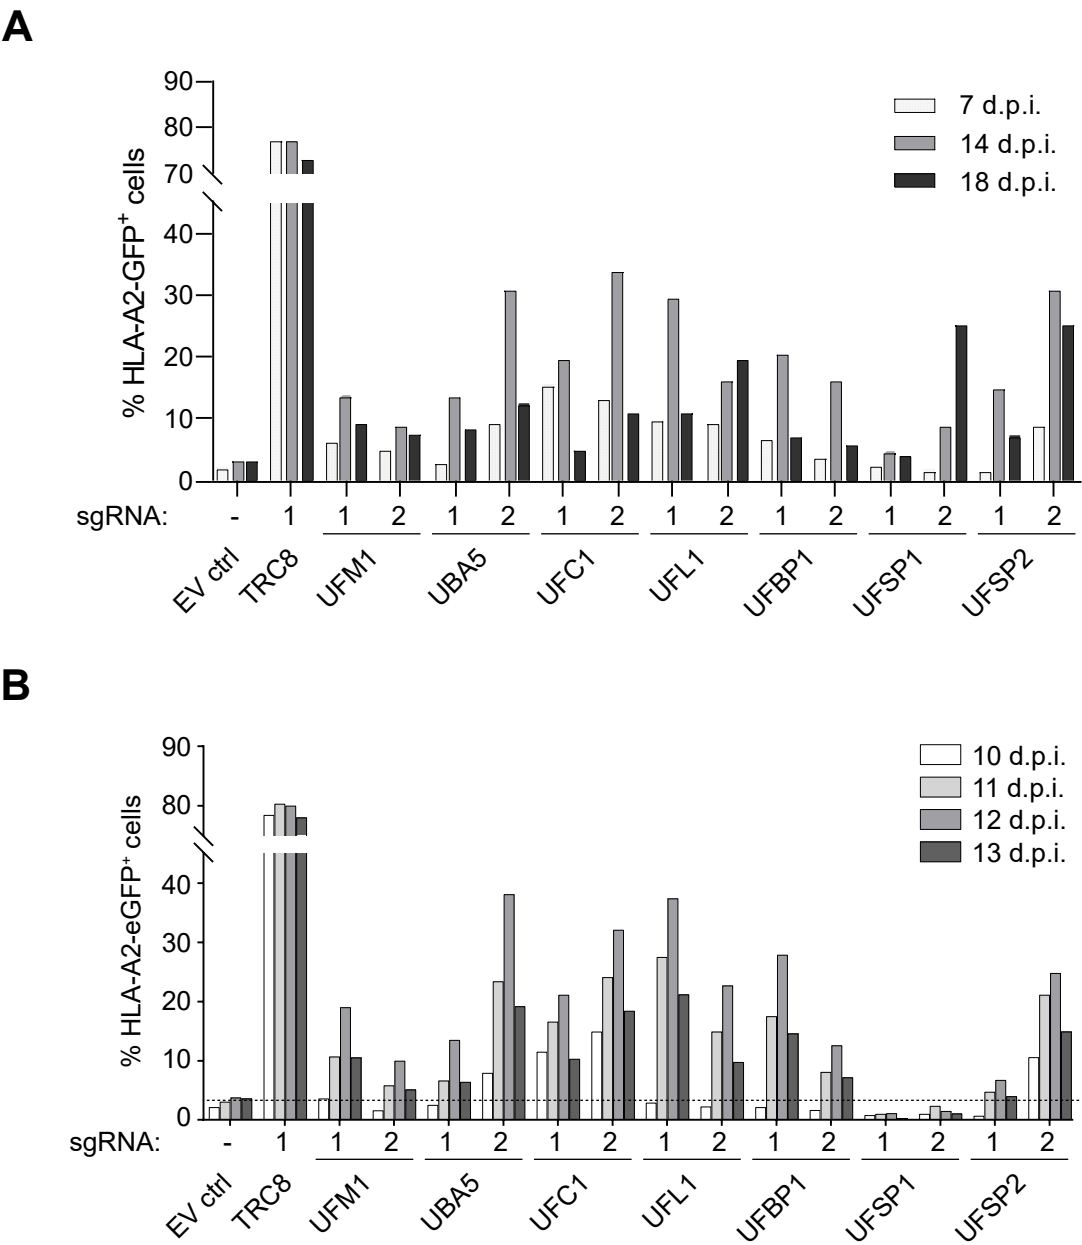

**Figure S2: Determination of the optimal timepoint for detecting HLA-I rescue.** sgRNAs targeting TRC8 or all players of the UFMylation pathway were introduced as described in figure 2. Flow cytometry was performed on multiple days in two independent experiments (**A**) and (**B**) to determine the optimal timepoint for detecting HLA-A2-eGFP rescue. Figure 2B shows a selection of the data from these experiments: the 14 d.p.i. (in A) and 12 d.p.i. (in B) timepoints.



**Figure S3: Clonal knockout cell lines for UFM1 and UBA5 show stable HLA-I rescue in the presence of HCMV US2**

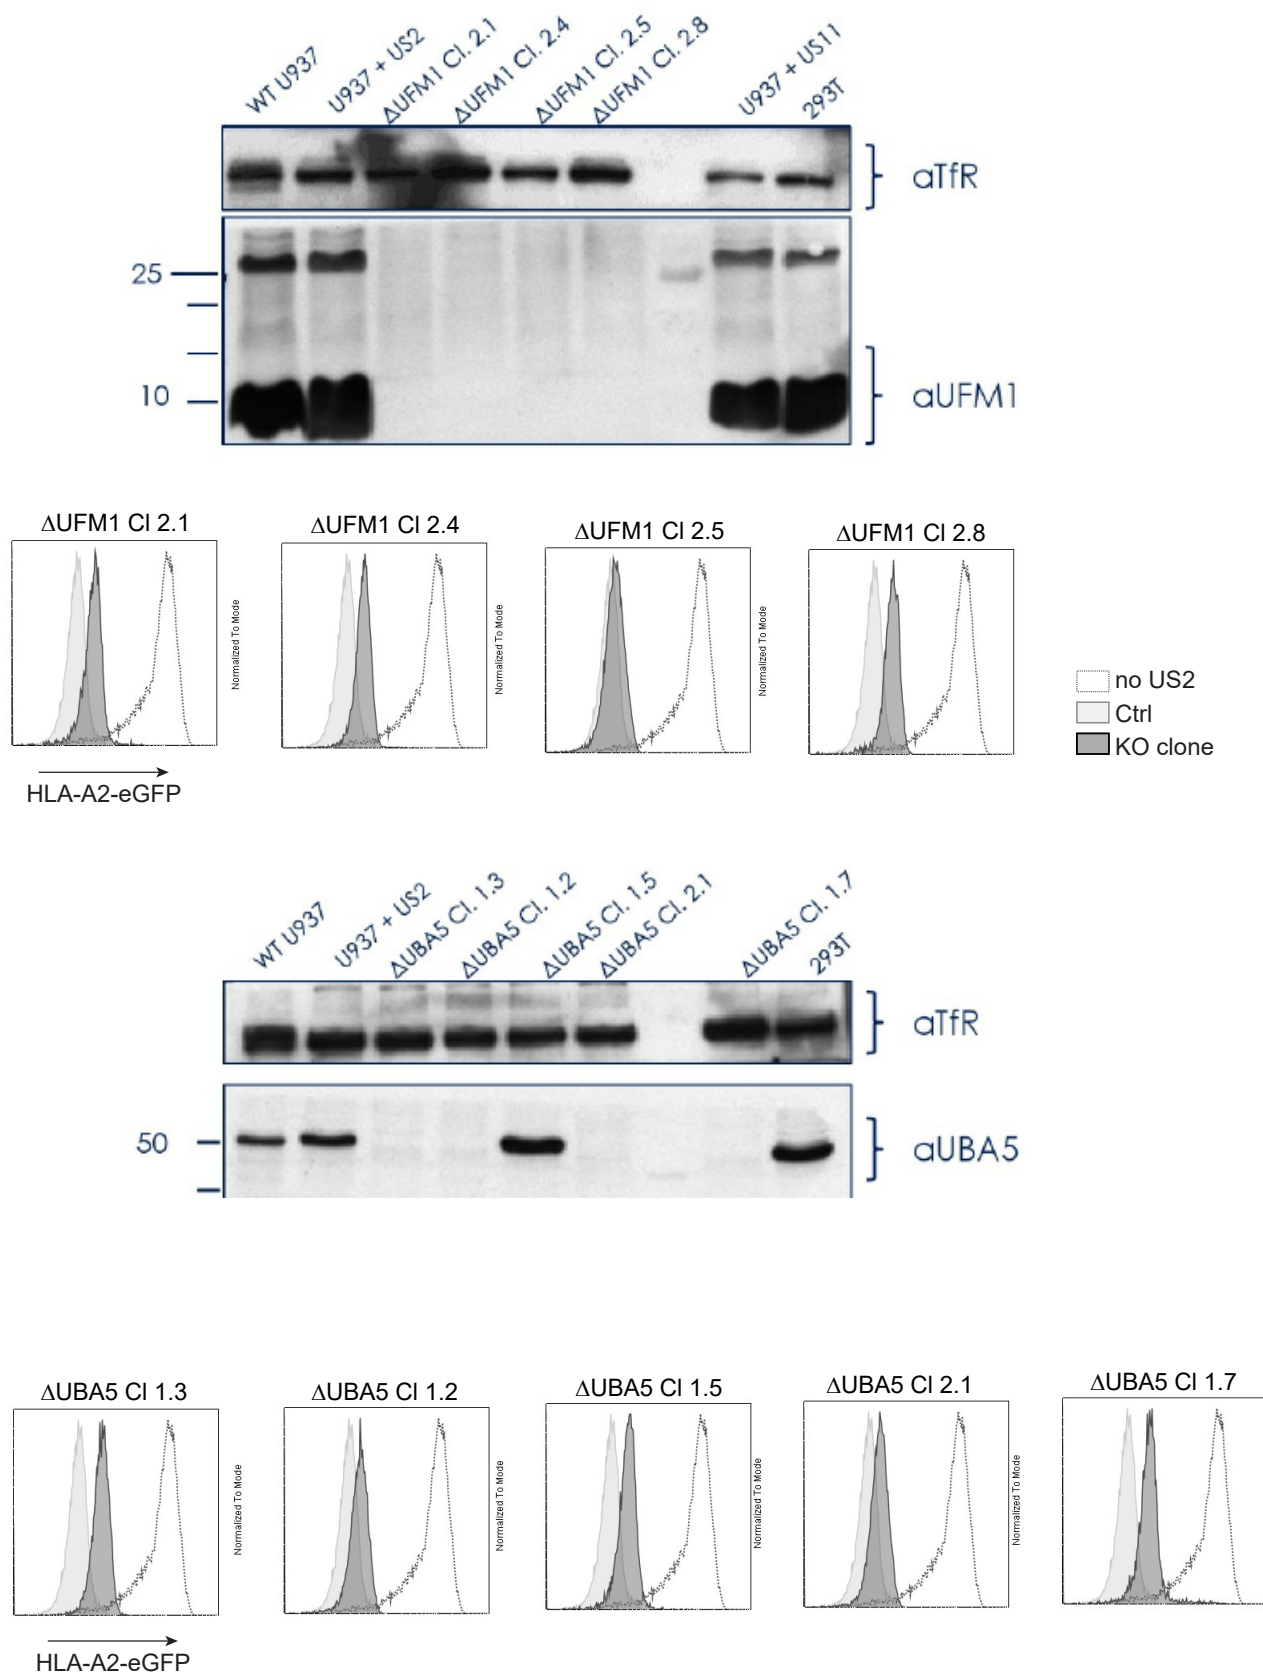

**Figure S3. Clonal knockout cell lines for UFM1 and UBA5 show HLA-I rescue in the presence of HCMV US2.** Western blot and flow cytometry analysis of additional clonal knockout cell lines for UFM1 and UBA5, as described in Figure 3. Note: the UBA5 clone 1.5 contains an in frame deletion (-15) and an out of frame deletion (-2); apparently, the mutant UBA5 protein encoded by the allele containing the in frame deletion is detectable but it is not functional. As a result, a rescue of HLA-I is observed.

**Figure S4: Mutant UFM1 lacking its C-terminus is unable to bind UBA5**

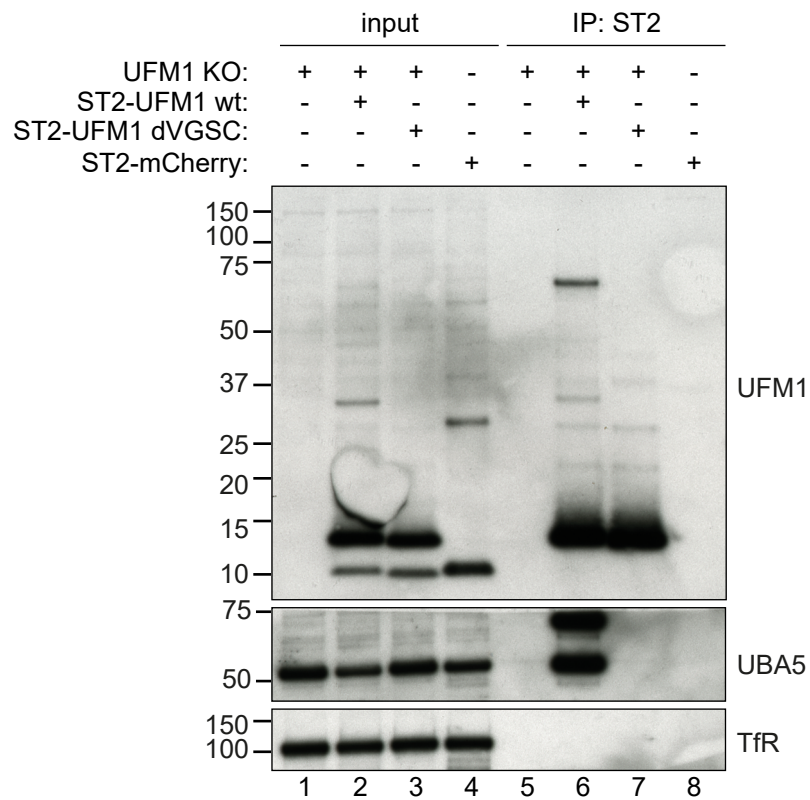

**Figure S4: Mutant UFM1 lacking its C-terminus is unable to bind UBA5.** StrepII-tagged WT UFM1 or a  $\Delta$ VGSC mutant were expressed in clonal UFM1 knockout cells. As a control, StrepII-mCherry was introduced in UFM1-expressing cells. These StrepII-tagged constructs were immunoprecipitated in 1% LMNG lysis buffer. Input and immunoprecipitation samples were loaded on Western blot and stained for UFM1.

**Figure S5: HLA class I is ubiquitinated in US2 expressing cells upon proteasome inhibition**

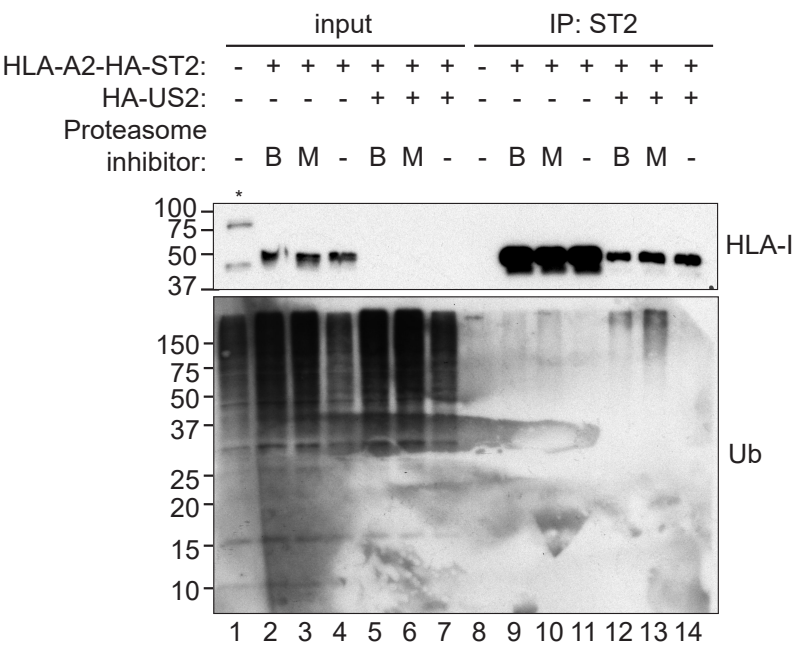

**Figure S5: HLA class I is ubiquitinated in US2 expressing cells upon proteasome inhibition.** U937 cells expressing HLAA2-HA-ST2 in the presence or absence of US2 were incubated with the proteasome inhibitors Bortezomib (B) or MG132 (M) to accumulate ubiquitinated HLA class I that would otherwise be degraded by the proteasome. HLA-A2-HA-StrepII was immunoprecipitated from these cells in 1% Digitonin lysis buffer, immunoblotted, and stained for ubiquitination.

## Supplementary information 1

Target genes and genomic target sites of sgRNAs used in this study.

| sgRNA name | sgRNA target site        |
|------------|--------------------------|
| TRC8_1     | AGGAAGATGACAGGCGTCT      |
| TMEM129_1  | GCACACGGCGAACACCAGAT     |
| UFM1_1     | AAACGCACAGACTGCTGGTGAGTA |
| UFM1_2     | ACCGACAAGTGAATTATTACCAA  |
| UBA5_1     | ACCGAGTGTGATGACAGAAATTGC |
| UBA5_2     | GCCTACTATTGCTACGGCAA     |
| UFC1_1     | CCCACAACCTCACGATCTCG     |
| UFC1_2     | CGGTGCTGAAGACTAACGC      |
| UFL1_1     | GTTGGCGGCGGACTTCCAGC     |
| UFL1_2     | gAACCGCCTAATCTCTTCCC     |
| UFBP1_1    | GTGGCGCCTGTGTGGTACT      |
| UFBP1_2    | GTAGCGGCGGCTCTGCTAGT     |
| UFSP1_1    | GCTGCCTCGCTCACTTCGGA     |
| UFSP1_2    | GCCTCTGCCTCGCTCACTT      |
| UFSP2_1    | gTAGCTGAAAAGCCAAATCA     |
| UFSP2_2    | GCTAGCTACTCCTAATGGT      |
| COQ2_1     | AGCTCACCCAAGGCTAGTTG     |
| COQ2_2     | GAATAGCTCCAGTGCCAAAG     |
| REXO1L1_1  | TGCGAGCCACAGCTCCCTGC     |
| REXO1L1_2  | CTATCTCCTTCAGTTCTGCT     |
| HIGD2A_1   | CACTTACCTATGGGTACCAC     |
| HIGD2A_2   | CTCAGCTCATGATGCGCACC     |
| TMEM261_1  | GCCGATGACCATCTGCGTAA     |
| TMEM261_2  | TCCATGGACCATTACGCAGA     |
| CARS2_1    | TTCCCTCGCCAGTCTTTATG     |
| CARS2_2    | TATGCTGCATCCAAAAACCT     |
| MTIF2_1    | GTTAAAGGGCGATAATCTGA     |
| MTIF2_2    | TCTATTACTGTTCTTCCAC      |
| NDUFB11_1  | TCACAAGCCTCTCAGCTTCG     |
| NDUFB11_2  | TGGCCTATCTGCCTGACTAC     |
| HSPA13_1   | GATGACCATCGCGTGAACAG     |
| HSPA13_2   | CCAAGTCTATCACCAAGACG     |
| PSMB7_1    | CCAGCTCATTTCTTCCAACC     |
| PSMB7_2    | TAATAGGATGGCATAGTTCT     |
| PSMD13_1   | CCGCAGAGCATCTTTGTAGT     |
| PSMD13_2   | AATTCAGTTGTTGTGCCTCA     |
| SRP72_1    | AACTGCCCTGCATTGTAAAG     |
| SRP72_2    | TAACCTCTCTCCTTTGAAA      |

|           |                       |
|-----------|-----------------------|
| SRPR_1    | ACTGGTTTGCTGGTAGCCAA  |
| SRPR_2    | CTCAAAACTCTACCAAACCT  |
| SRPRB_1   | GGAAAACGTTGCTCTTTGTC  |
| SRPRB_2   | TACAGCACAGCTGTCAGTAA  |
| SEC61A1_1 | TGTTGTACTGGCCACGGTAG  |
| SEC61A1_2 | ATCAAGTCGGCCCGCTACCG  |
| SEC61B_1  | TAGTGGCCCTGTTCCAGTAT  |
| SEC61B_2  | GTAGAATCGCCACATCCCCC  |
| SEC62_1   | CTGTGGTTGACTACTGCAAC  |
| SEC62_2   | GTAGTCAACCACAGACTCCC  |
| SEC63_1   | GTGATGAGGTTATGTTTCATG |
| SEC63_2   | TTGGTATTCTCGGTCTGTTT  |

## Supplementary information 2

### Depleted

| UniProtKB | Gene name    | Full name                                                               | Function                                                               |
|-----------|--------------|-------------------------------------------------------------------------|------------------------------------------------------------------------|
| P12814    | <b>ACTN1</b> | Actinin Alpha 1                                                         | Actin-binding protein                                                  |
| Q13155    | <b>AIMP2</b> | Aminoacyl tRNA Synthetase Complex Interacting Multifunctional Protein 2 | Non-enzymatic factor of aminoacyl tRNA-synthetase complex              |
| P01344    | <b>IGF2</b>  | Insulin-Like Growth Factor 2                                            | Insulin-like growth factor (imprinted gene related to tumorigenesis)   |
| O95613    | <b>PCNT</b>  | Pericentrin                                                             | Integral component of the pericentriolar material; binds to calmodulin |
| Q9H4A3    | <b>WNK1</b>  | WNK Lysine Deficient Protein Kinase 1                                   | Regulation of electrolyte homeostasis                                  |

### Enriched non-ribosomal proteins (blue)

| UniProtKB | Gene name     | Full name                                                                 | Function                                                                                                   |
|-----------|---------------|---------------------------------------------------------------------------|------------------------------------------------------------------------------------------------------------|
| P47813    | <b>EIF1AX</b> | Eukaryotic Translation Initiation Factor 1A, X-linked                     | Binding of 40S ribosome, eIF2, GTP, Met-tRNA <sup>i</sup> and eIF3 to 5' end of capped mRNA                |
| P62861    | <b>FAU</b>    | Ubiquitin Like and Ribosomal Protein S30 Fusion                           | Fusion protein of ubiquitin-like protein FUBI (N-term) and ribosomal protein S30 (C-term)                  |
| P63244    | <b>GNB2L1</b> | Guanidine Nucleotide Binding Protein (G-protein), Beta Polypeptide 2-Like | Scaffolding protein in 40S ribosomal subunit involved in ribosomal quality control                         |
| P19338    | <b>NCL</b>    | Nucleolin                                                                 | Nucleolar phosphoprotein involved in synthesis and maturation of ribosomes                                 |
| Q96S44    | <b>TP53RK</b> | TP53 Regulating Kinase                                                    | Required for the modification of tRNAs that read codons beginning with alanine                             |
| P62995    | <b>TRA2B</b>  | Transformer 2 Beta Homolog                                                | Nuclear protein involved in pre-mRNA splicing                                                              |
| Q8WZ42    | <b>TTN</b>    | Titin                                                                     | Key component in the assembly and functioning of vertebrate striated muscle                                |
| O43396    | <b>TXNL1</b>  | Thioredoxin Like 1                                                        | Active thioredoxin; component of the 19S regulatory cap of the 26S proteasome                              |
| Q9GZZ9    | <b>UBA5</b>   | Ubiquitin Like Modifier Activating Enzyme 5                               | E1 activating enzyme for UFM1                                                                              |
| Q9Y3C8    | <b>UFC1</b>   | Ubiquitin-Fold Modifier Conjugating Enzyme 1                              | E2 conjugating enzyme for UFM1                                                                             |
| P61960    | <b>UFM1</b>   | Ubiquitin Fold Modifier 1                                                 | Ubiquitin-like molecule that is conjugated to target proteins in a manner analogous to ubiquitination      |
| Q92900    | <b>UPF1</b>   | Up-Frameshift Mutation 1 Homolog                                          | nonsense mediated decay of mRNAs; recruited to mRNAs upon translation termination and to stalled ribosomes |

### Enriched ribosomal proteins (red)

| UniProtKB | Gene name     | Full name              | Function                                                 |
|-----------|---------------|------------------------|----------------------------------------------------------|
| P62906    | <b>RPL10A</b> | Ribosomal Protein L10a | ribosomal protein that is a component of the 60S subunit |
| P62913    | <b>RPL11</b>  | Ribosomal Protein L11  | ribosomal protein that is a component of the 60S subunit |
| P30050    | <b>RPL12</b>  | Ribosomal Protein L12  | ribosomal protein that is a component of the 60S subunit |
| P26373    | <b>RPL13</b>  | Ribosomal Protein L13  | ribosomal protein that is a component of the 60S subunit |
| P40429    | <b>RPL13A</b> | Ribosomal Protein L13A | ribosomal protein that is a component of the 60S subunit |
| P50914    | <b>RPL14</b>  | Ribosomal Protein L14  | ribosomal protein that is a component of the 60S subunit |
| P61313    | <b>RPL15</b>  | Ribosomal Protein L15  | ribosomal protein that is a component of the 60S subunit |
| P18621    | <b>RPL17</b>  | Ribosomal Protein L17  | ribosomal protein that is a component of the 60S subunit |
| Q07020    | <b>RPL18</b>  | Ribosomal Protein L18  | ribosomal protein that is a component of the 60S subunit |
| Q02543    | <b>RPL18A</b> | Ribosomal Protein L18A | ribosomal protein that is a component of the 60S subunit |
| P84098    | <b>RPL19</b>  | Ribosomal Protein L19  | ribosomal protein that is a component of the 60S subunit |
| P46778    | <b>RPL21</b>  | Ribosomal Protein L21  | ribosomal protein that is a component of the 60S subunit |
| P62750    | <b>RPL23A</b> | Ribosomal Protein L23A | ribosomal protein that is a component of the 60S subunit |
| P83731    | <b>RPL24</b>  | Ribosomal Protein L24  | ribosomal protein that is a component of the 60S subunit |
| P61254    | <b>RPL26</b>  | Ribosomal Protein L26  | ribosomal protein that is a component of the 60S subunit |
| P61353    | <b>RPL27</b>  | Ribosomal Protein L27  | ribosomal protein that is a component of the 60S subunit |
| P46776    | <b>RPL27A</b> | Ribosomal Protein L27A | ribosomal protein that is a component of the 60S subunit |
| P46779    | <b>RPL28</b>  | Ribosomal Protein L28  | ribosomal protein that is a component of the 60S subunit |
| P47914    | <b>RPL29</b>  | Ribosomal Protein L29  | ribosomal protein that is a component of the 60S subunit |

|        |               |                                            |                                                                                                                                             |
|--------|---------------|--------------------------------------------|---------------------------------------------------------------------------------------------------------------------------------------------|
| P39023 | <b>RPL3</b>   | Ribosomal Protein L3                       | ribosomal protein that is a component of the 60S subunit                                                                                    |
| P62899 | <b>RPL31</b>  | Ribosomal Protein L31                      | ribosomal protein that is a component of the 60S subunit                                                                                    |
| P62910 | <b>RPL32</b>  | Ribosomal Protein L32                      | ribosomal protein that is a component of the 60S subunit                                                                                    |
| P49207 | <b>RPL34</b>  | Ribosomal Protein L34                      | ribosomal protein that is a component of the 60S subunit                                                                                    |
| P42766 | <b>RPL35</b>  | Ribosomal Protein L35                      | ribosomal protein that is a component of the 60S subunit                                                                                    |
| P18077 | <b>RPL35A</b> | Ribosomal Protein L35A                     | ribosomal protein that is a component of the 60S subunit                                                                                    |
| Q9Y3U8 | <b>RPL36</b>  | Ribosomal Protein L36                      | ribosomal protein that is a component of the 60S subunit                                                                                    |
| P61513 | <b>RPL37A</b> | Ribosomal Protein L37A                     | ribosomal protein that is a component of the 60S subunit                                                                                    |
| P62891 | <b>RPL39</b>  | Ribosomal Protein L39                      | ribosomal protein that is a component of the 60S subunit                                                                                    |
| P36578 | <b>RPL4</b>   | Ribosomal Protein L4                       | ribosomal protein that is a component of the 60S subunit                                                                                    |
| P46777 | <b>RPL5</b>   | Ribosomal Protein L5                       | ribosomal protein that is a component of the 60S subunit                                                                                    |
| Q02878 | <b>RPL6</b>   | Ribosomal Protein L6                       | ribosomal protein that is a component of the 60S subunit                                                                                    |
| P18124 | <b>RPL7</b>   | Ribosomal Protein L7                       | ribosomal protein that is a component of the 60S subunit                                                                                    |
| P62424 | <b>RPL7A</b>  | Ribosomal Protein L7A                      | ribosomal protein that is a component of the 60S subunit                                                                                    |
| P62917 | <b>RPL8</b>   | Ribosomal Protein L8                       | ribosomal protein that is a component of the 60S subunit                                                                                    |
| P32969 | <b>RPL9</b>   | Ribosomal Protein L9                       | ribosomal protein that is a component of the 60S subunit                                                                                    |
| P05388 | <b>RPLP0</b>  | Ribosomal Protein Lateral Stalk Subunit P0 | ribosomal protein that is a component of the 60S subunit                                                                                    |
| P05386 | <b>RPLP1</b>  | Ribosomal Protein Lateral Stalk Subunit P1 | ribosomal protein that is a component of the 60S subunit                                                                                    |
| P05387 | <b>RPLP2</b>  | Ribosomal Protein Lateral Stalk Subunit P2 | ribosomal protein that is a component of the 60S subunit                                                                                    |
| P46783 | <b>RPS10</b>  | Ribosomal Protein S10                      | ribosomal protein that is a component of the 40S subunit                                                                                    |
| P62280 | <b>RPS11</b>  | Ribosomal Protein S11                      | ribosomal protein that is a component of the 40S subunit                                                                                    |
| P62277 | <b>RPS13</b>  | Ribosomal Protein S13                      | ribosomal protein that is a component of the 40S subunit                                                                                    |
| P62263 | <b>RPS14</b>  | Ribosomal Protein S14                      | ribosomal protein that is a component of the 40S subunit                                                                                    |
| P62841 | <b>RPS15</b>  | Ribosomal Protein S15                      | ribosomal protein that is a component of the 40S subunit                                                                                    |
| P62249 | <b>RPS16</b>  | Ribosomal Protein S16                      | ribosomal protein that is a component of the 40S subunit                                                                                    |
| P08708 | <b>RPS17</b>  | Ribosomal Protein S17                      | ribosomal protein that is a component of the 40S subunit                                                                                    |
| P39019 | <b>RPS19</b>  | Ribosomal Protein S19                      | ribosomal protein that is a component of the 40S subunit                                                                                    |
| P15880 | <b>RPS2</b>   | Ribosomal Protein S2                       | ribosomal protein that is a component of the 40S subunit                                                                                    |
| P60866 | <b>RPS20</b>  | Ribosomal Protein S20                      | ribosomal protein that is a component of the 40S subunit                                                                                    |
| P63220 | <b>RPS21</b>  | Ribosomal Protein S21                      | ribosomal protein that is a component of the 40S subunit                                                                                    |
| P62266 | <b>RPS23</b>  | Ribosomal Protein S23                      | ribosomal protein that is a component of the 40S subunit                                                                                    |
| P62847 | <b>RPS24</b>  | Ribosomal Protein S24                      | ribosomal protein that is a component of the 40S subunit                                                                                    |
| P62851 | <b>RPS25</b>  | Ribosomal Protein S25                      | ribosomal protein that is a component of the 40S subunit                                                                                    |
| P62854 | <b>RPS26</b>  | Ribosomal Protein S26                      | ribosomal protein that is a component of the 40S subunit                                                                                    |
| Q71UM5 | <b>RPS27L</b> | Ribosomal Protein S27L                     | ribosomal protein that is a component of the 40S subunit                                                                                    |
| P62857 | <b>RPS28</b>  | Ribosomal Protein S28                      | ribosomal protein that is a component of the 40S subunit                                                                                    |
| P23396 | <b>RPS3</b>   | Ribosomal Protein S3                       | ribosomal protein that is a component of the 40S subunit                                                                                    |
| P61247 | <b>RPS3A</b>  | Ribosomal Protein S3A                      | ribosomal protein that is a component of the 40S subunit                                                                                    |
| P62701 | <b>RPS4X</b>  | Ribosomal Protein S4X                      | ribosomal protein that is a component of the 40S subunit                                                                                    |
| P46782 | <b>RPS5</b>   | Ribosomal Protein S5                       | ribosomal protein that is a component of the 40S subunit                                                                                    |
| P62753 | <b>RPS6</b>   | Ribosomal Protein S6                       | ribosomal protein that is a component of the 40S subunit                                                                                    |
| P62081 | <b>RPS7</b>   | Ribosomal Protein S7                       | ribosomal protein that is a component of the 40S subunit                                                                                    |
| P62241 | <b>RPS8</b>   | Ribosomal Protein S8                       | ribosomal protein that is a component of the 40S subunit                                                                                    |
| P46781 | <b>RPS9</b>   | Ribosomal Protein S9                       | ribosomal protein that is a component of the 40S subunit                                                                                    |
| P08865 | <b>RPSA</b>   | Ribosomal Protein SA                       | Required for the assembly and/or stability of the 40S ribosomal subunit and for the processing of the 20S rRNA-precursor to mature 18S rRNA |

**List of significantly enriched/depleted UFM1-binding proteins:** Overview of gene names and protein functions of the hits identified in mass spectrometric analysis of proteins interacting with UFM1. (In Figure 5C, only significantly enriched proteins (red and blue) are shown.).
